# Supplementary material for: New γ-pyrone glycoside from Pachira glabra and assessment of its gastroprotective activity using an alcohol-induced gastric ulcer model in rats
Source: Royal Society of Chemistry journal article supplement (doi:10.1039/c9fo02800e), 2020-01-01
Supplement: c9fo02800e1.pdf [file c9fo02800e1.pdf]

## Supplementary data

### New $\gamma$ -pyrone glycoside from *Pachira glabra* and assessment of its gastro-protective activity using alcohol- induced gastric ulcer in rat model

#### List of supplementary figures

**Figure S1.** Scheme of extraction of *P. glabra* leaves and isolation of HMGLu.

**Figure S2.**  $^1\text{H}$  NMR data for HMGLu.

**Figure S3.** APT data for HMGLu.

**Figure S4.**  $^1\text{H}$  COSY data for HMGLu.

**Figure S5.** HSQC data for HMGLu.

**Figure S6.** HMBC data for HMGLu.

**Figure S7.** ESI<sup>-</sup> spectral data for HMGLu.

**Figure S8.** HR-ESI<sup>+</sup> for HMGLu.

**Figure S9.** Experimental scheme of *in vivo* assessment of the gastroprotective activity of HMGLu.

**Figure S10.** Mechanism diagram of the *in vivo* gastroprotective activity of HMGLu.

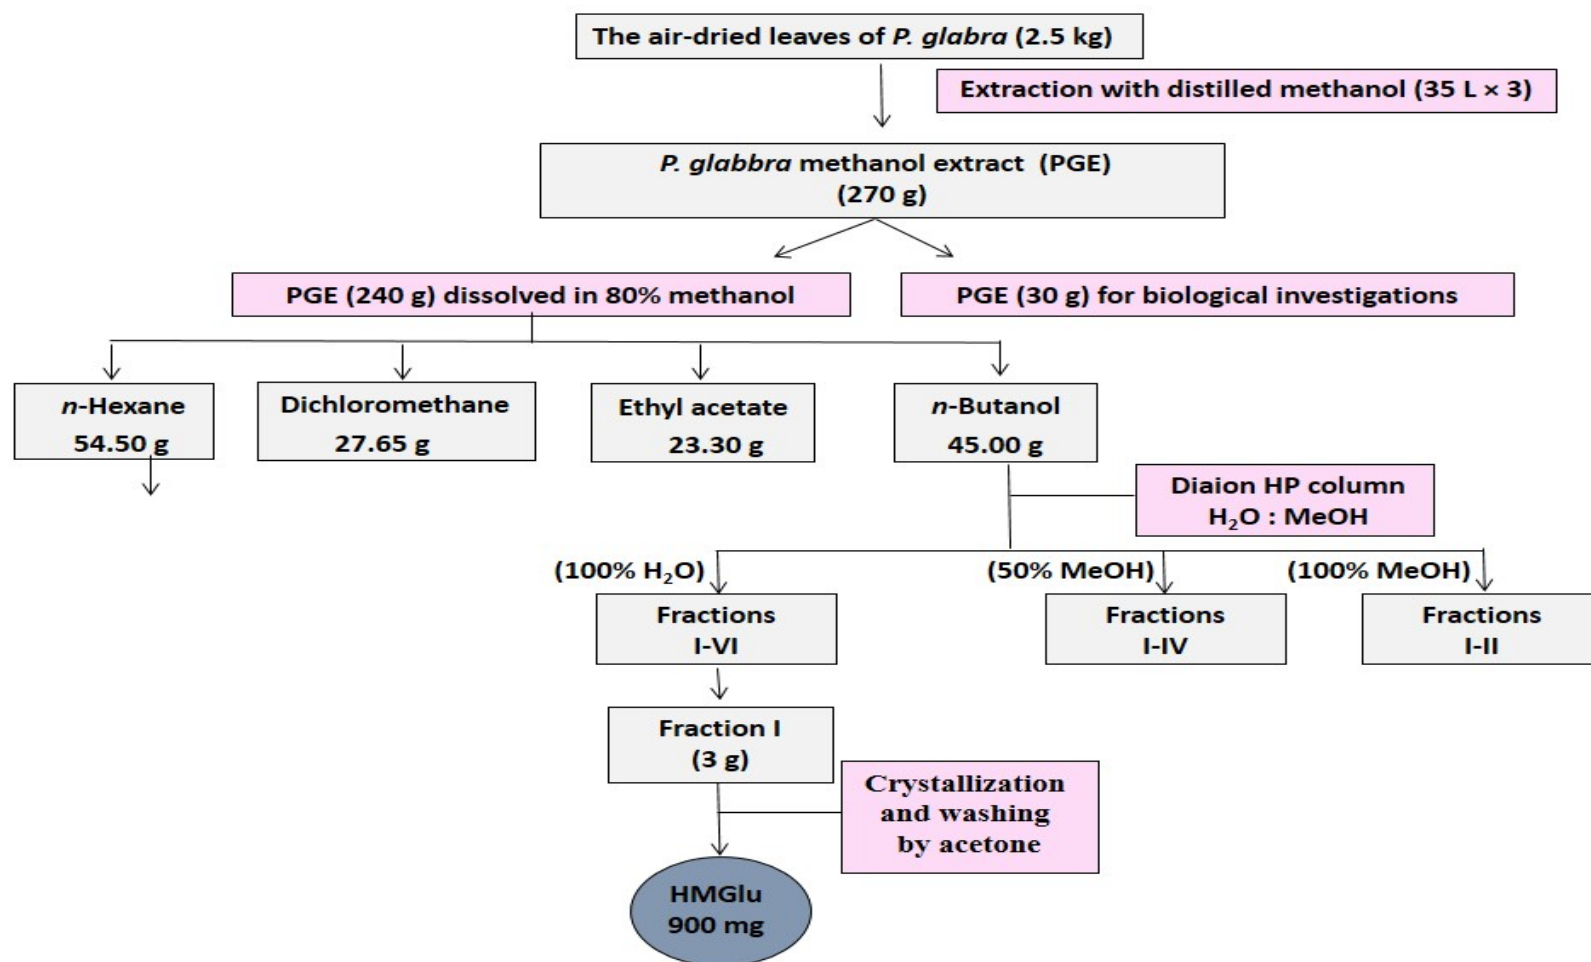

**Figure S1.** Scheme of extraction of *P. glabra* leaves and isolation of HMGLu.

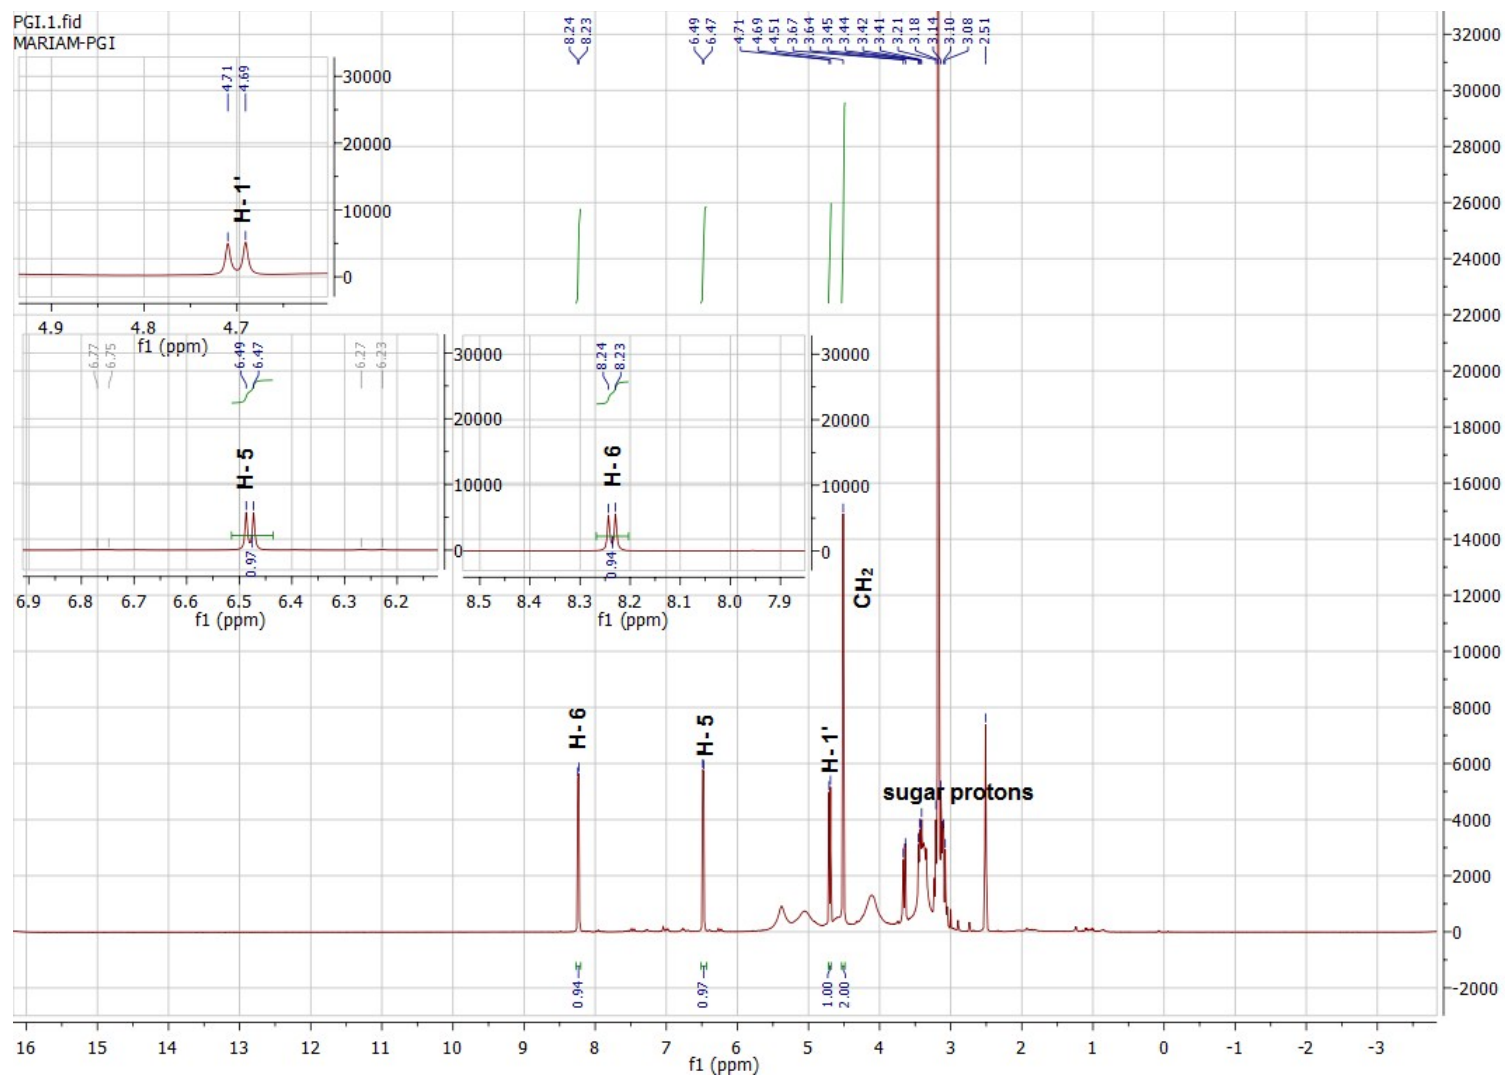

Figure S2.  $^1\text{H}$  NMR data for HMGlucose.

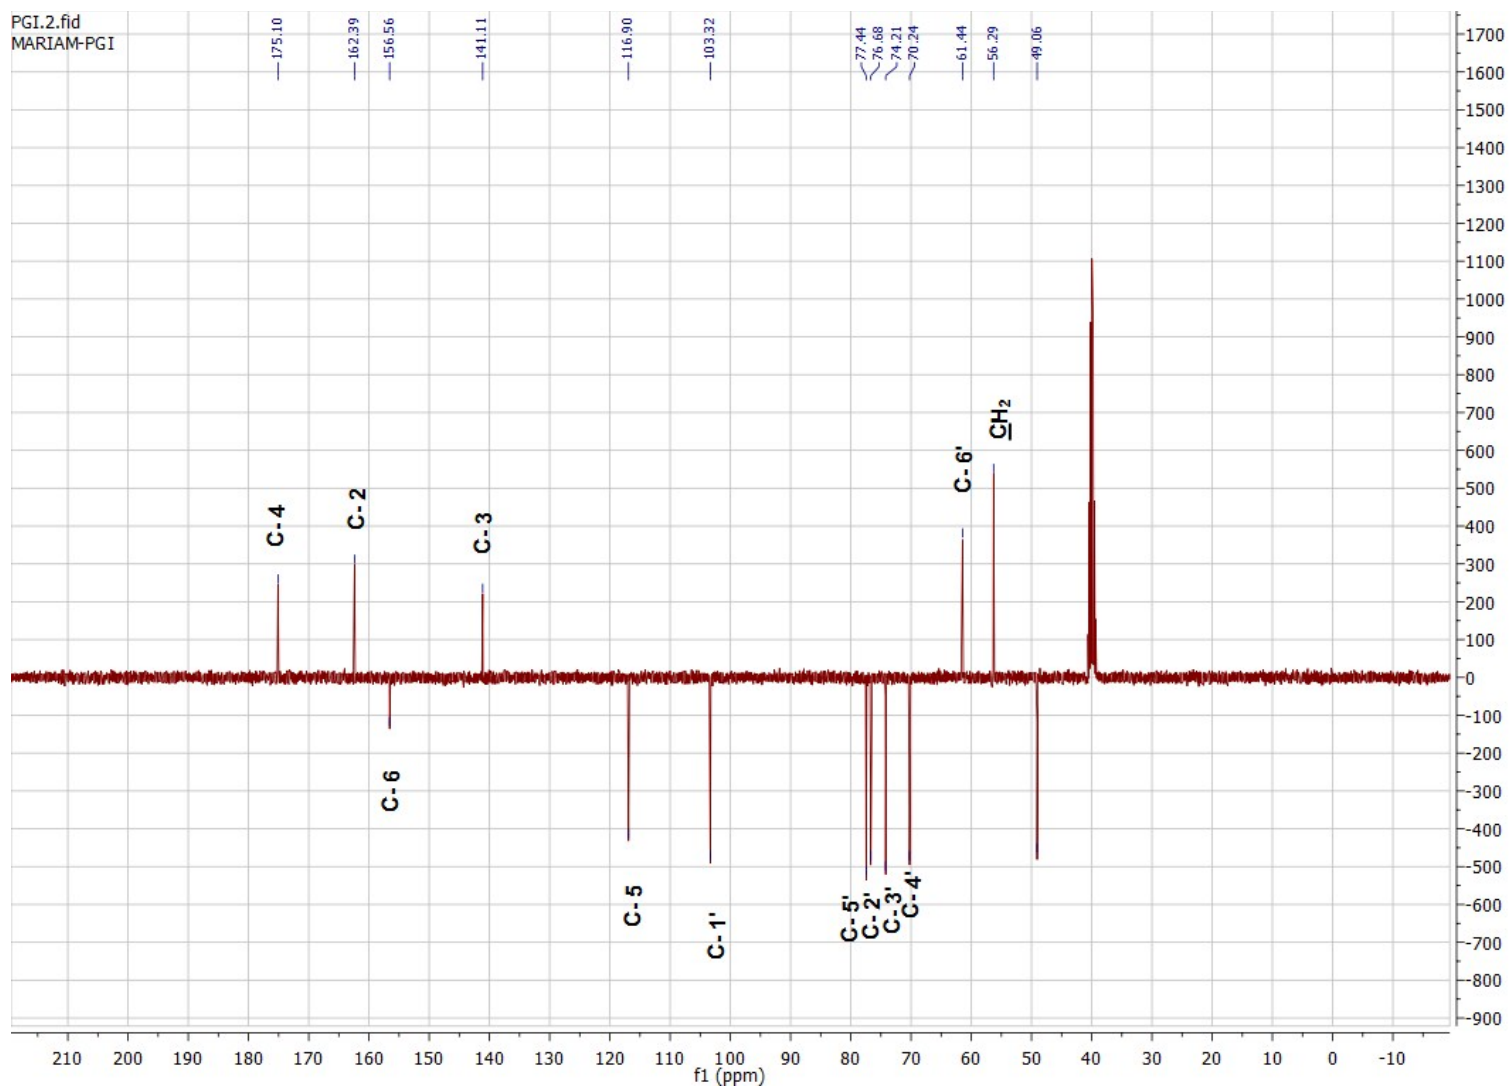

Figure S3. APT data for HMGlucose.

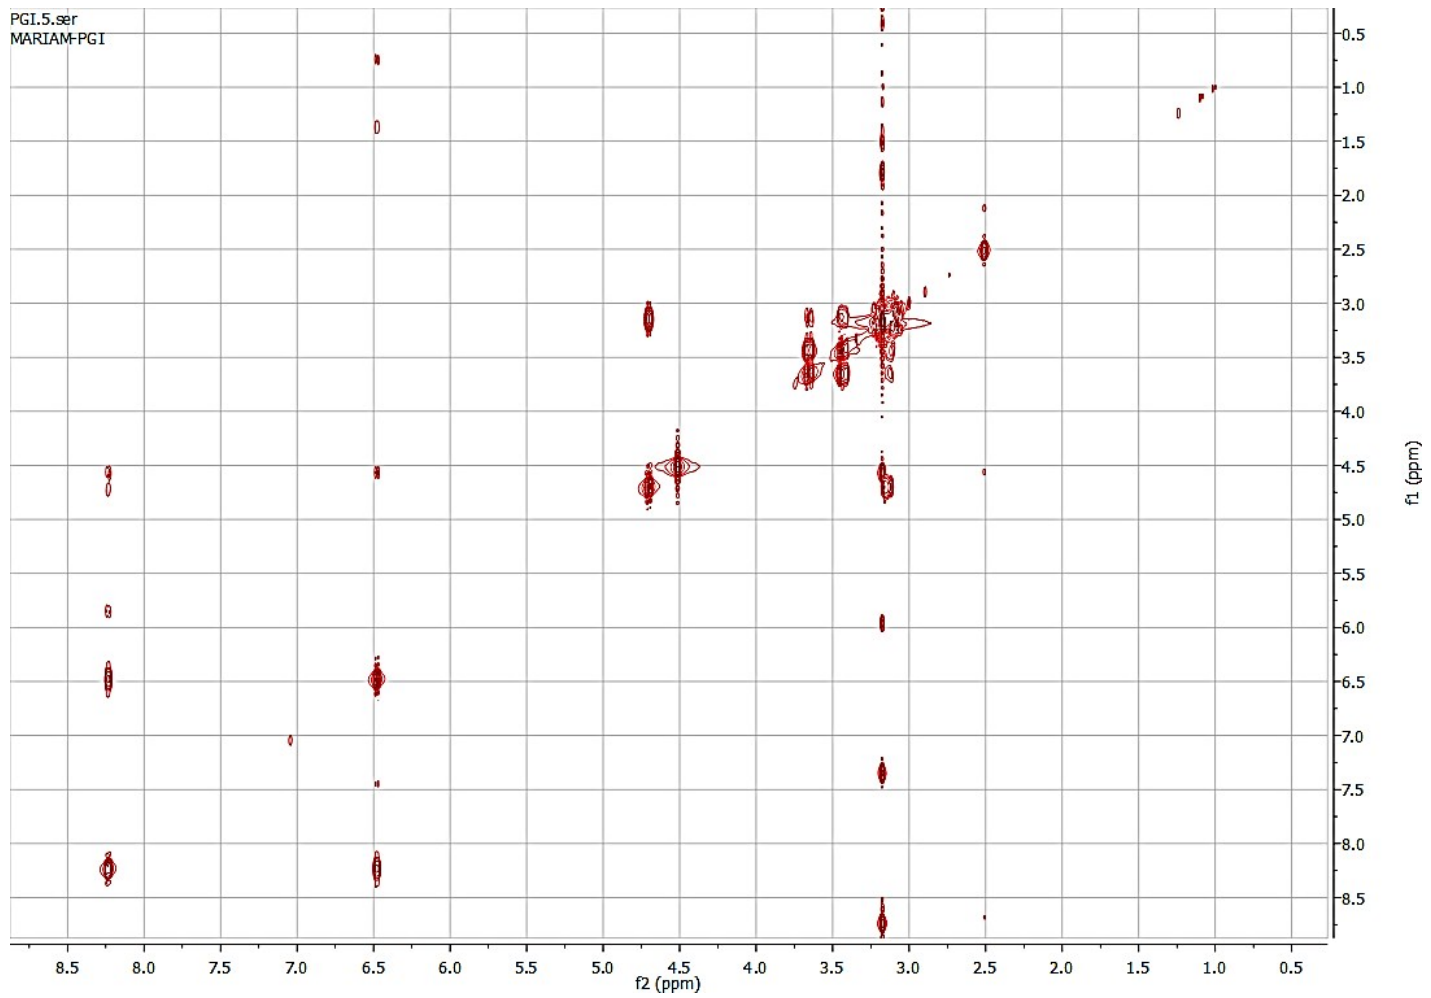

**Figure S4.**  $^1\text{H}$  COSY data for HMGlucose.

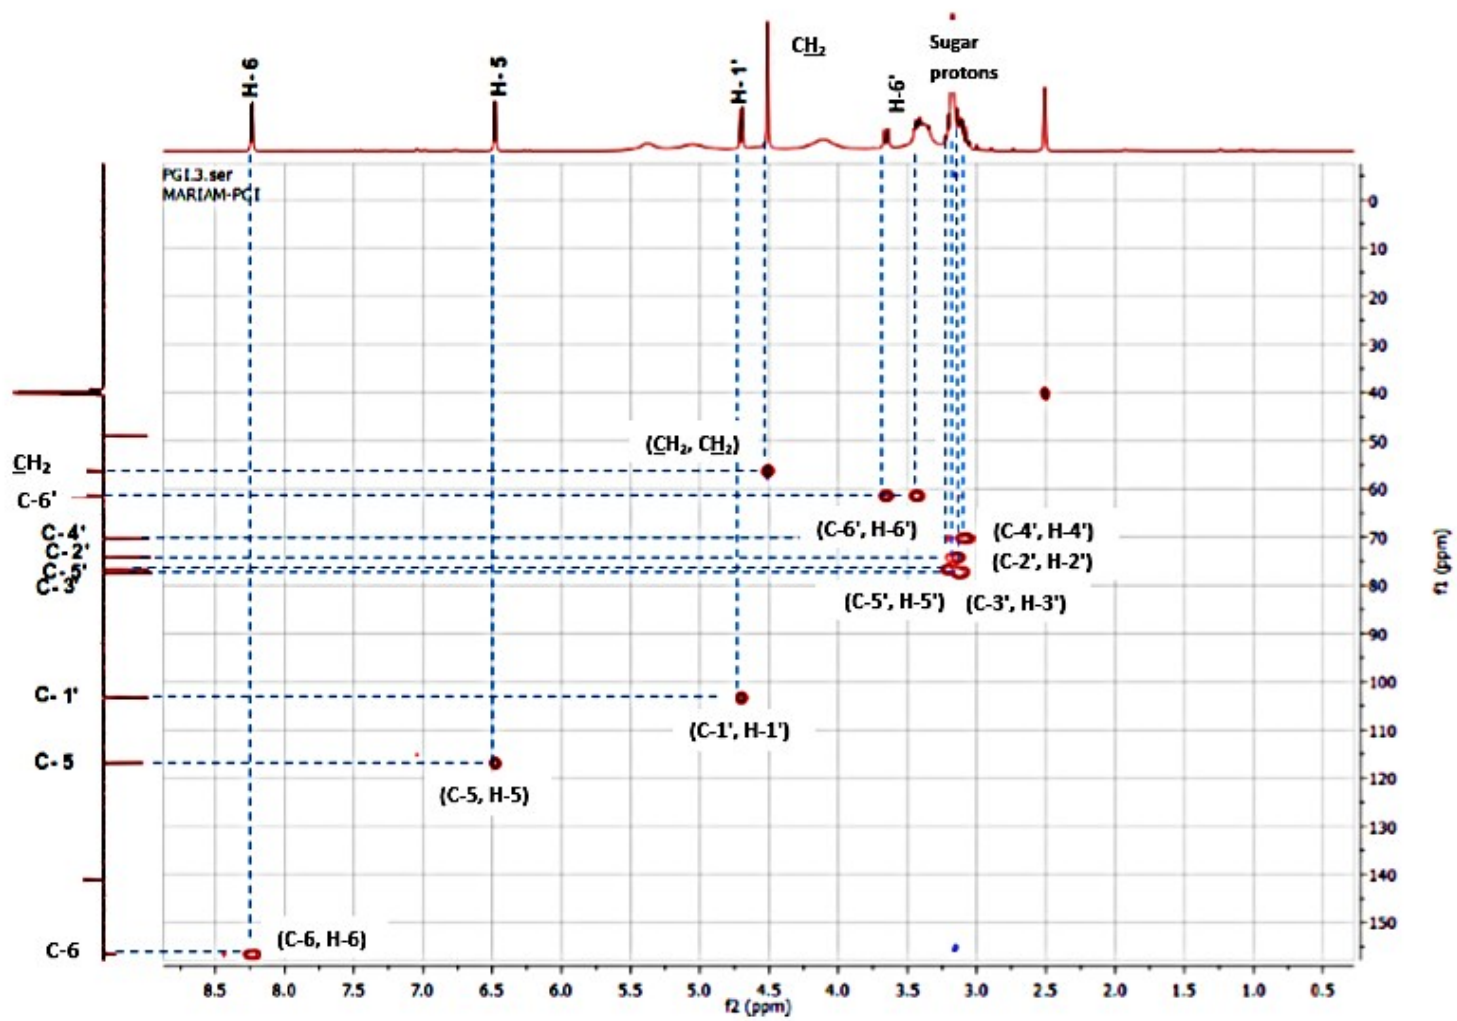

Figure S5. HSQC data for HMglu.

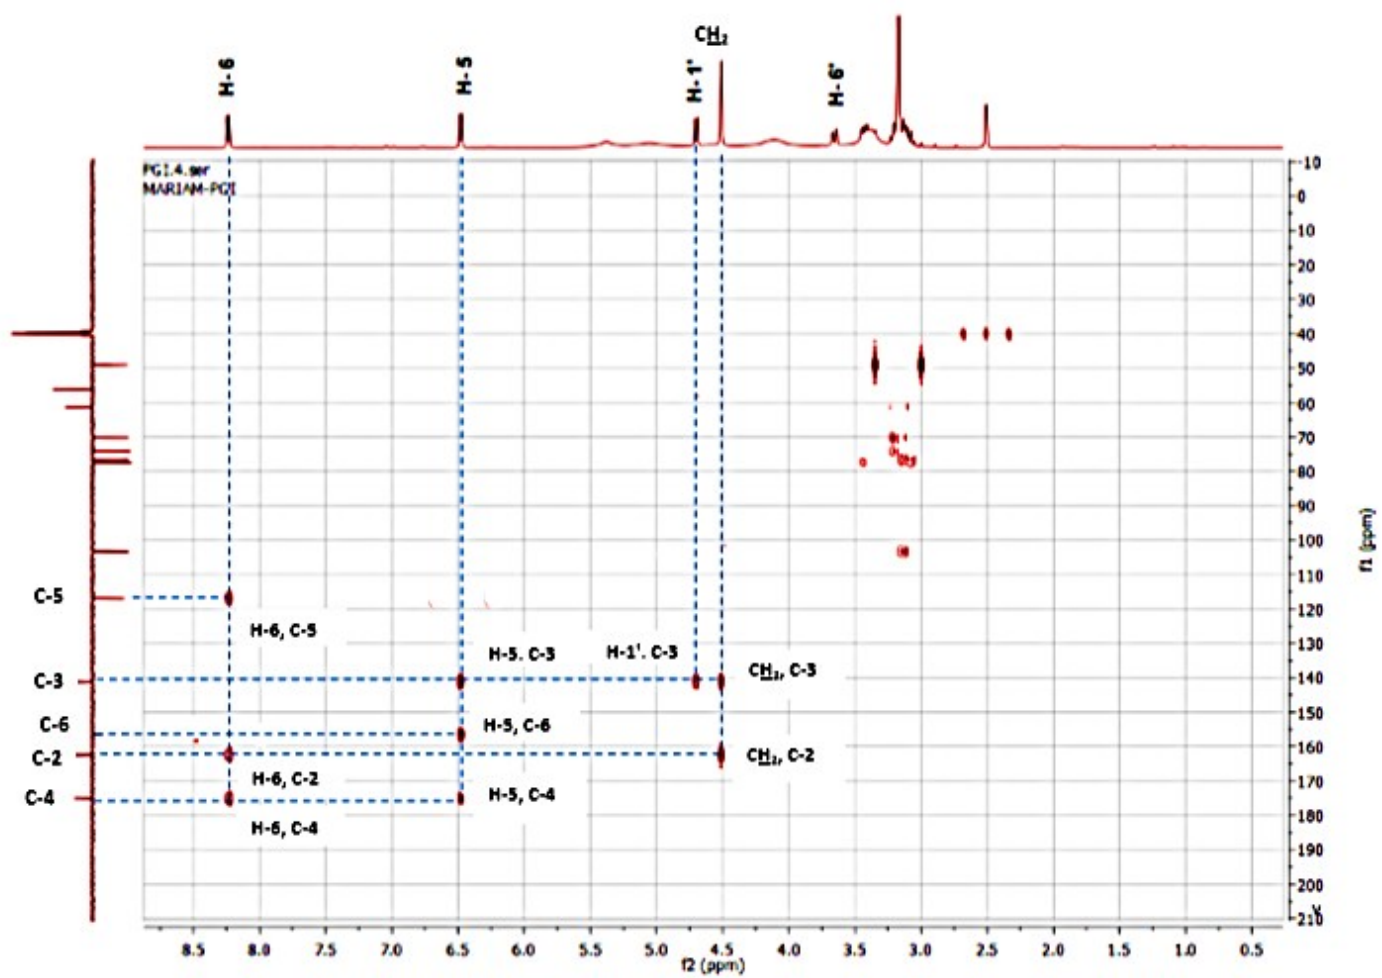

Figure S6. HMBC data for HMGlucose.

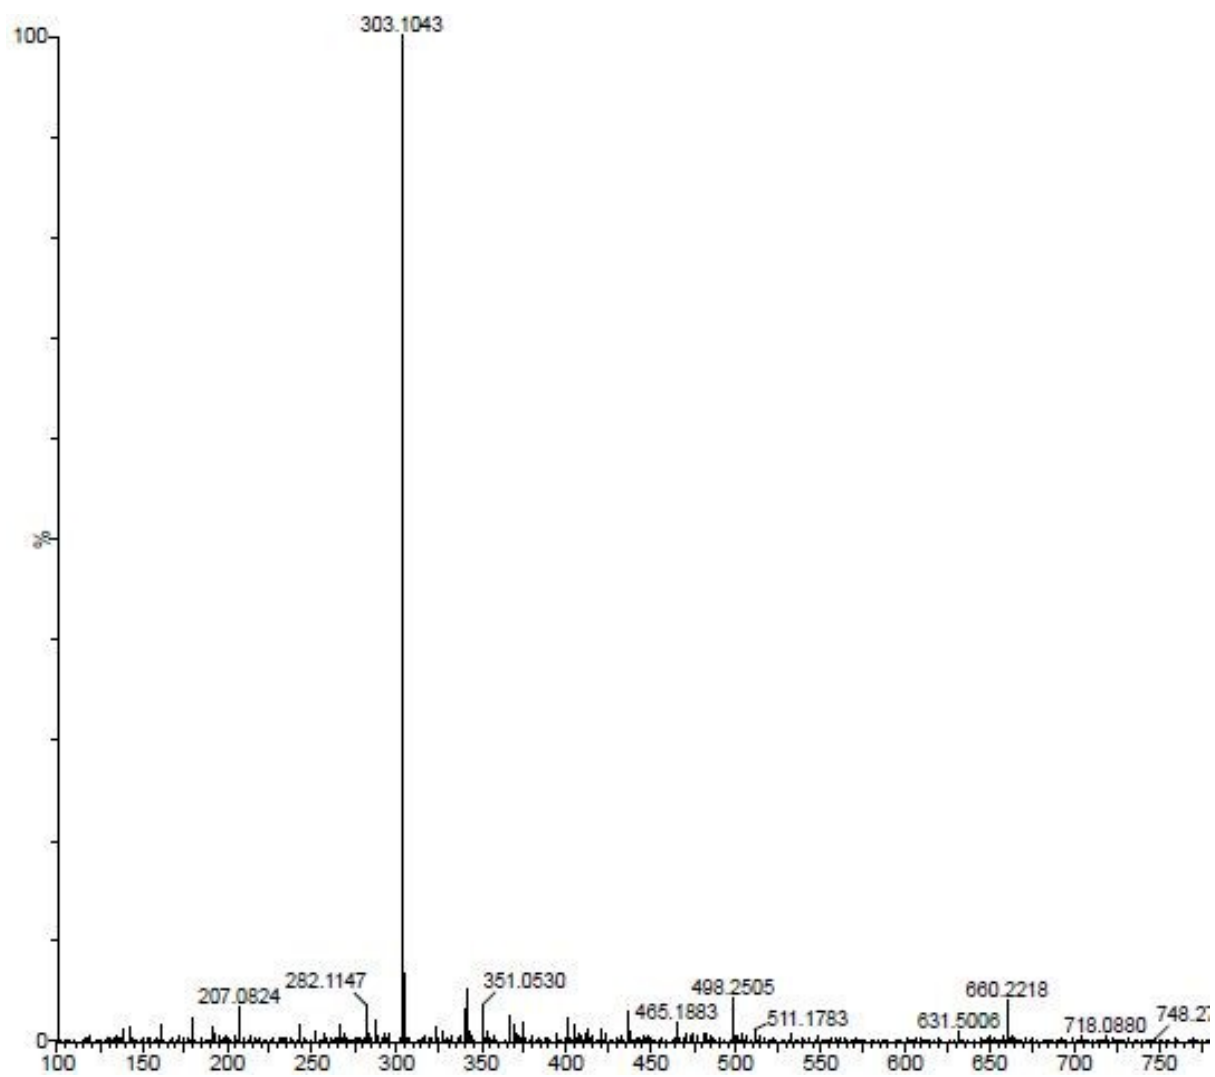

Figure S7. ESI<sup>-</sup> spectral data for HMGluc.



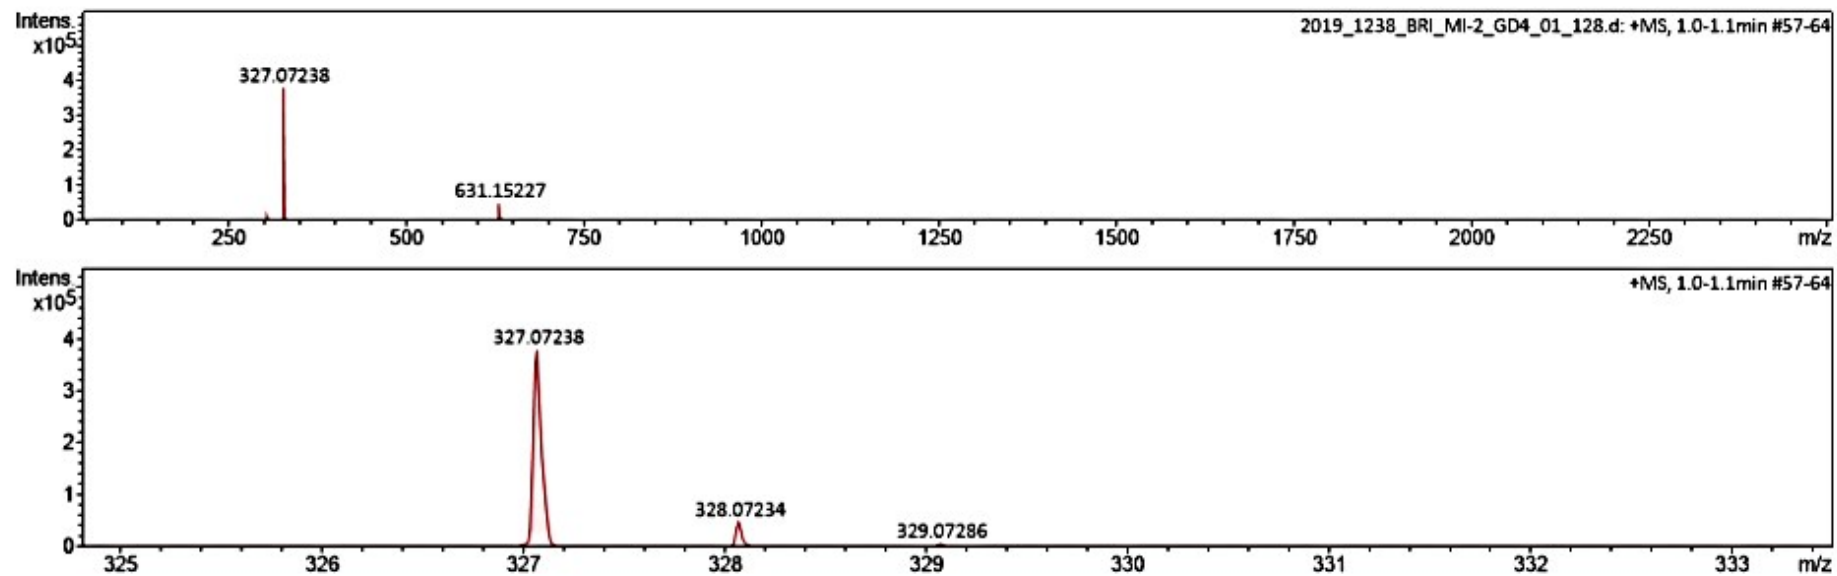

Figure S8. HR-ESI<sup>+</sup> for HMGluc.

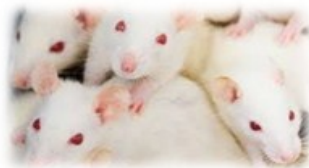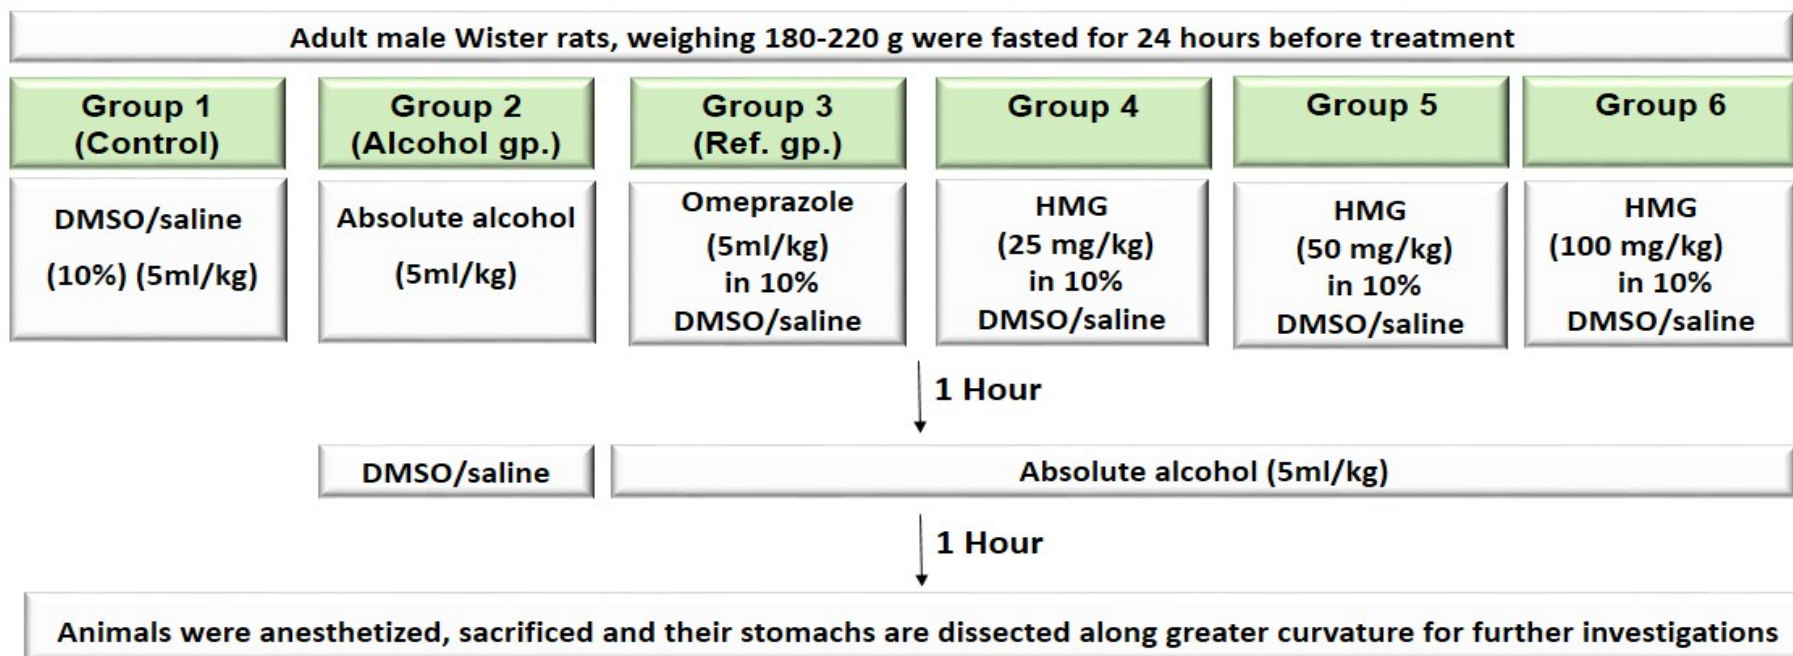

**Figure S9.** Experimental scheme of *in vivo* assessment of the gastroprotective activity of HMGLu.

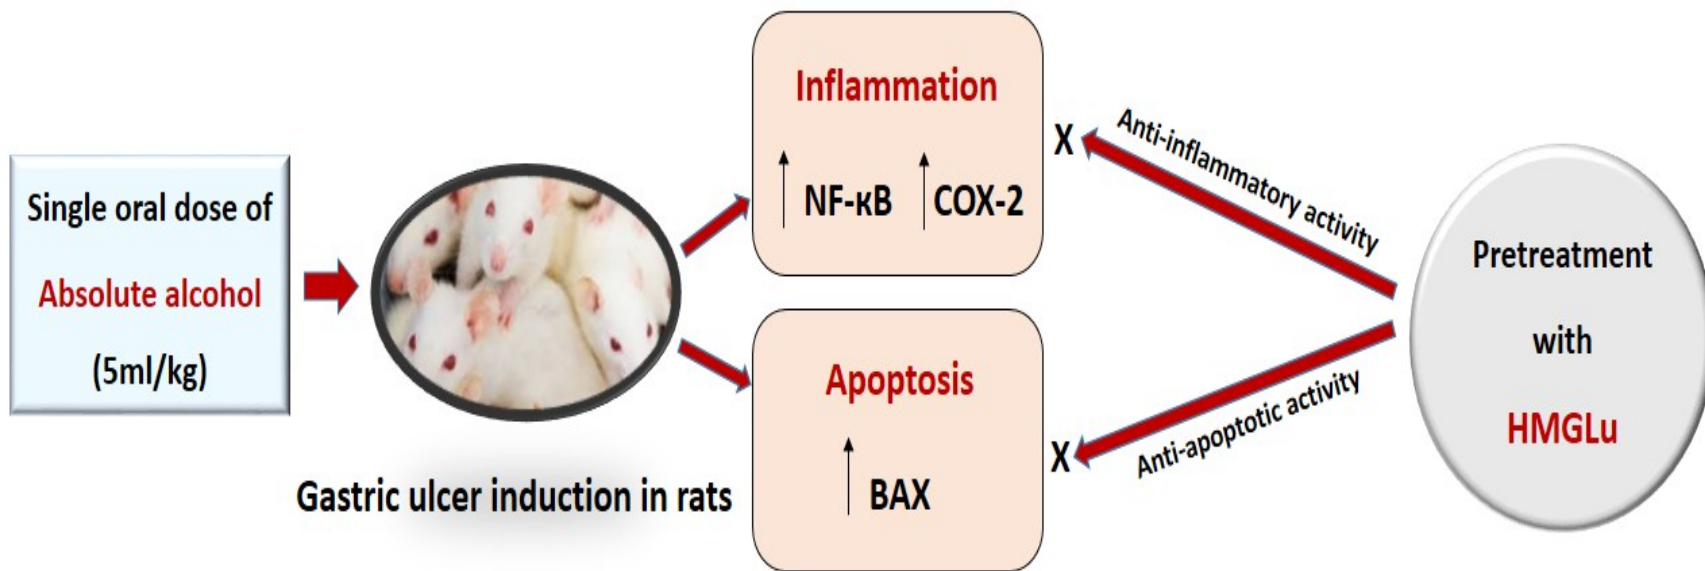

**Figure S10.** Mechanism diagram of the *in vivo* gastroprotective activity of HMGLu.
